# Supplementary material
Source: publisher site journal article supplement (https://www.dovepress.com/article/122945)
Supplement: Supplementary file 1 [file get_supplementary_file.php]

## Supplementary materials

**Table S1** List of canine specific primers and conditions used for RT-PCR analysis

| Target gene    | Primer sequence 5'–3'                                      | Annealing temperature (°C) | Amplicon size (bp) | Reference (year) or NCBI Reference Sequence number |
|----------------|------------------------------------------------------------|----------------------------|--------------------|----------------------------------------------------|
| <i>GAPDH</i>   | F:CCATCTTCCAGGAGCGAGAT<br>R:TTCTCCATGGTGGTGAAGAC           | 60                         | 97                 | Vieira et al (2010) <sup>1</sup>                   |
| <i>BAX</i>     | F: TTCCGAGTGGCAGCTGAGATGTTT<br>R: TGCTGGCAAAGTAGAAGAGGGCAA | 60                         | 79                 | Del Puerto et al (2010) <sup>2</sup>               |
| <i>CASP3</i>   | F:TCATTATTCAGGCCTGCCGAGG<br>R:TTCTGACAGGCCATGTCATCCTCA     | 60                         | 86                 | Del Puerto et al (2010) <sup>2</sup>               |
| <i>CASP8</i>   | F:GATGCAGATGCGTTGAGT<br>R:ACTGTGGTCCATGCTTTG               | 57                         | 120                | XM_005640426.2                                     |
| <i>CASP9</i>   | F:ACGAGACTCACACCAGAGG<br>R:TCGTCCAGAACCATTGTC              | 57                         | 150                | NM_001031633.1                                     |
| <i>OCN</i>     | F:GAGGGCAGCGAGGTGGTGAG<br>R:TCAGCCAGCTCGTCACAGTTGG         | 62                         | 134                | Umehara et al (2012) <sup>3</sup>                  |
| <i>OPN</i>     | F:CATTGATGGCCGAGGTGATAG<br>R:AAGTGATGTGAAGTCCTCCTC         | 60                         | 114                | Vieira et al (2010) <sup>1</sup>                   |
| <i>Col 1A1</i> | F:TAGACACCACCCTCAAGAGC<br>R:CCAGTCGGAGTGGCACAT             | 60                         | 118                | Vieira et al (2010) <sup>1</sup>                   |
| <i>ACAN</i>    | F:ATCAACAGTGCTTACCAAGACA<br>R:ATAACCTCACAGCGATAGATCC       | 62                         | 122                | Vieira et al (2010) <sup>1</sup>                   |
| <i>Col 2A1</i> | F:GAAACTCTGCCACCCTGAAT<br>R:GCTCCACCAGTTCTTCTTGG           | 62                         | 156                | Vieira et al (2010) <sup>1</sup>                   |
| <i>SOX9</i>    | F: GCTCGCAGTACGACTACACTGAC<br>R:GTTTCATGTAGGTGAAGGTGGAG    | 60                         | 101                | Vieira et al (2010) <sup>1</sup>                   |
| <i>TUBB3</i>   | F:AGCCAAGTTCTGGGAAGTCA<br>R:CCCCTCTGACCAAAGATGAA           | 57                         | 238                | Wilcox et al (2011) <sup>4</sup>                   |
| <i>MAP2</i>    | F:GAAGTTCAGGCCCACTCTCC<br>R:CCTGTTGCTGTGGTTTTCCG           | 58                         | 107                | XM_005640597.2                                     |
| <i>NES</i>     | F:GAGAACCAGGAGCAAGTGAA<br>R:TTTCCAGAGGCTTCAGTGTC           | 62                         | 328                | Valenzuela et al (2008) <sup>5</sup>               |
| <i>NCAM</i>    | F:AGGCAGAGCATAGTGAATGC<br>R:AGGCTTCACAGGTCAGAGTG           | 60                         | 343                | Valenzuela et al (2008) <sup>5</sup>               |

**Abbreviations:** F, forward; R, reverse; RT-PCR, reverse transcriptase–polymerase chain reaction; bp, base pair.

A

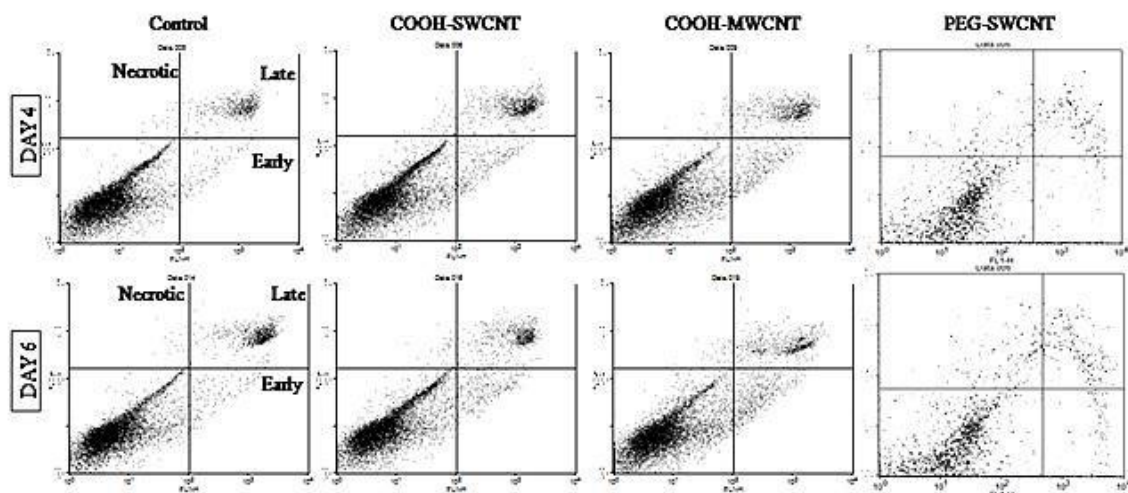

Representative dot-plots of Annexin V-PI flow cytometry assay on day 4 and 6

B

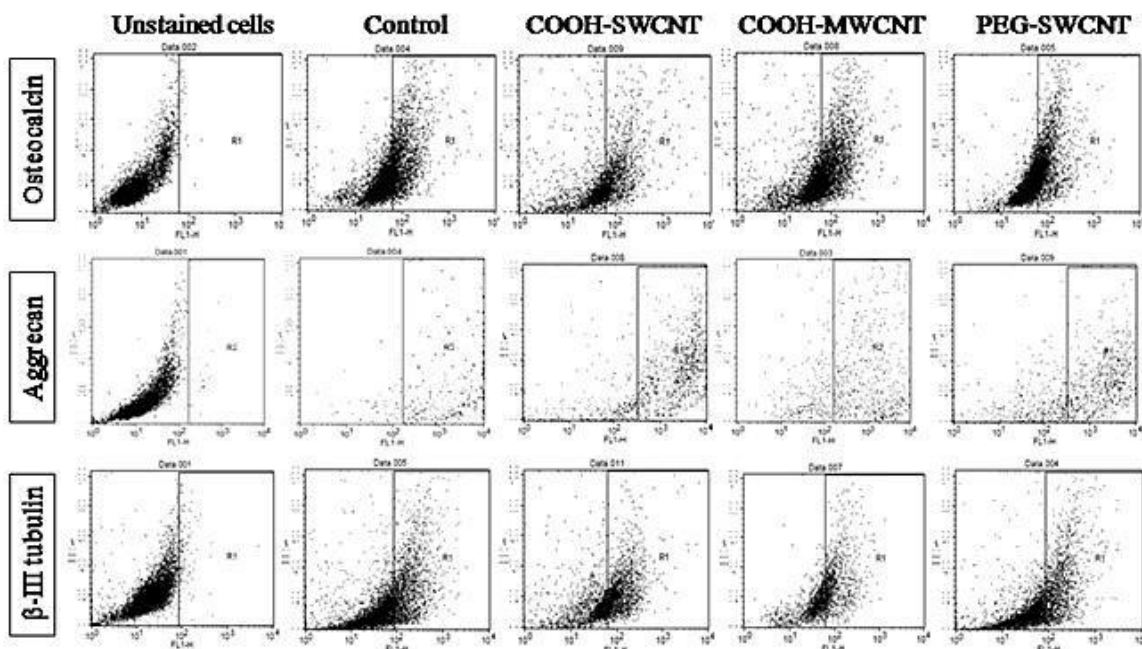

Representative dot-plots of flow cytometry of osteocalcin, aggrecan, β-III tubulin positive cells

**Figure S1** Representative dot plots of (A) Annexin V–PI flow cytometry assay on Days 4 and 6, as well as (B) flow cytometry for osteocalcin-, aggrecan-, and β-III tubulin-positive cells.

**Abbreviations:** CNT, carbon nanotube; MWCNT, multiwalled CNT; PEG, polyethylene glycol; PI, propidium iodide; SWCNT, single-walled CNT.

## References:

1. Vieira NM, Brandalise V, Zucconi E, et al. Isolation, characterization and differentiation potential of canine adipose-derived stem cells. *Cell Transplant*. 2010;19:279–289.
2. Del Puerto HL, Martins AS, Moro L. et al. Caspase-3/-8/-9, Bax and Bcl-2 expression in the cerebellum, lymph nodes and leucocytes of dogs naturally infected with canine distemper virus. *Gent. Mol. Res*. 2010;9:151–161.
3. Umehara K, Iimura T, Sakamoto K, et al. Canine oral mucosal fibroblasts differentiate into osteoblastic cells in response to BMP2. *The Anatomical Rec*. 2012;295:1327–1335.
4. Wilcox JT, Lai JKY, Semple E, et al. Synaptically competent neurons derived from canine embryonic stem cells by lineage selection with EGF and noggin. *Plos One*. 2011;6:e19786.
5. Valenzuela MJ, Dean SK, Sachdev P, et al. Neural precursors from canine skin: a new direction for testing autologous cell replacement in the brain. *Stem Cell Dev*. 2008. 17:1087–1094.
